# Supplementary material for: Outcomes and outcome measurement instruments in lower-limb lengthening surgery: a scoping review to inform core outcome set development
Source: PubMed Central journal article supplement (PMC11605704; doi:10.2340/17453674.2024.42488), 2024-11-29
Supplement: ActaO-95-42488-s1.pdf [file ActaO-95-42488-s1.pdf]

## Appendix 1. Search history

### Databases and results

| Database                         | Interface | Result          | Date       |
|----------------------------------|-----------|-----------------|------------|
| PubMed                           | NLM       | 2,658           | 23.09.2022 |
| Embase                           | Elsevier  | 2,982           | 29.09.2022 |
| Cochrane Library                 | Wiley     | 86              | 22.09.2022 |
| Web of Science                   | Clarivate | 1,615           | 29.09.2022 |
| Scopus                           | Elsevier  | 4,355           | 29.09.2022 |
| All<br>÷ duplicates with EndNote |           | 11,696<br>5,039 |            |

### Update February 2024

| Database                         | Interface | Result     | Date       |
|----------------------------------|-----------|------------|------------|
| PubMed                           | NLM       | 118        | 12.02.2024 |
| Embase                           | Elsevier  | 228        | 12.02.2024 |
| Cochrane Library                 | Wiley     | 6          | 12.02.2024 |
| Web of Science                   | Clarivate | 132        | 12.02.2024 |
| Scopus                           | Elsevier  | 222        | 12.02.2024 |
| All<br>÷ duplicates with EndNote |           | 706<br>269 |            |

### Update May 2024

| Database                         | Interface | Result    | Date       |
|----------------------------------|-----------|-----------|------------|
| PubMed                           | NLM       | 22        | 22.05.2024 |
| Embase                           | Elsevier  | 38        | 22.05.2024 |
| Cochrane Library                 | Wiley     | 0         | 22.05.2024 |
| Web of Science                   | Clarivate | 22        | 22.05.2024 |
| Scopus                           | Elsevier  | 50        | 22.05.2024 |
| All<br>÷ duplicates with EndNote |           | 132<br>46 |            |

### PubMed

| Search | Query                                                                                                                                                                                                                                                                                                                                                                                                                                                                                                                                                                                                                                                   | Results |
|--------|---------------------------------------------------------------------------------------------------------------------------------------------------------------------------------------------------------------------------------------------------------------------------------------------------------------------------------------------------------------------------------------------------------------------------------------------------------------------------------------------------------------------------------------------------------------------------------------------------------------------------------------------------------|---------|
| #27    | Search: ("Bone Lengthening"[Mesh:NoExp] OR bone lengthening[Text Word] OR limb lengthening[Text Word] OR leg lengthening[Text Word] OR femur lengthening[Text Word] OR femoral lengthening[Text Word] OR tibial lengthening[Text Word] OR limb extensi*[Text Word] OR limb equali*[Text Word]) AND ("Lower Extremity"[Mesh:NoExp] OR "Leg"[Mesh] OR "Thigh"[Mesh] OR "Bones of Lower Extremity"[Mesh:NoExp] OR "Femur"[Mesh] OR "Leg Bones"[Mesh:NoExp] OR "Fibula"[Mesh] OR "Tibia"[Mesh] OR lower extremit*[Text Word] OR lower limb*[Text Word] OR femur[Text Word] OR femoral[Text Word] OR leg[Text Word] OR legs[Text Word] OR tibia*[Text Word]) | 2,658   |

|     |                                                                                                                                                                                                                                                                                                                                                                                                                                                                                        |         |
|-----|----------------------------------------------------------------------------------------------------------------------------------------------------------------------------------------------------------------------------------------------------------------------------------------------------------------------------------------------------------------------------------------------------------------------------------------------------------------------------------------|---------|
|     | OR fibula*[Text Word] OR calf[Text Word] OR calves[Text Word] OR shin*[Text Word] OR thigh*[Text Word]) Sort by: Most Recent                                                                                                                                                                                                                                                                                                                                                           |         |
| #26 | Search: "Lower Extremity"[Mesh:NoExp] OR "Leg"[Mesh] OR "Thigh"[Mesh] OR "Bones of Lower Extremity"[Mesh:NoExp] OR "Femur"[Mesh] OR "Leg Bones"[Mesh:NoExp] OR "Fibula"[Mesh] OR "Tibia"[Mesh] OR lower extremit*[Text Word] OR lower limb*[Text Word] OR femur[Text Word] OR femoral[Text Word] OR leg[Text Word] OR legs[Text Word] OR tibia*[Text Word] OR fibula*[Text Word] OR calf[Text Word] OR calves[Text Word] OR shin*[Text Word] OR thigh*[Text Word] Sort by: Most Recent | 644,567 |
| #25 | Search: calf[Text Word] OR calves[Text Word] OR shin*[Text Word] OR thigh*[Text Word] Sort by: Most Recent                                                                                                                                                                                                                                                                                                                                                                             | 106,445 |
| #24 | Search: tibia*[Text Word] OR fibula*[Text Word] Sort by: Most Recent                                                                                                                                                                                                                                                                                                                                                                                                                   | 130,357 |
| #23 | Search: leg[Text Word] OR legs[Text Word] Sort by: Most Recent                                                                                                                                                                                                                                                                                                                                                                                                                         | 186,877 |
| #22 | Search: femur[Text Word] OR femoral[Text Word] Sort by: Most Recent                                                                                                                                                                                                                                                                                                                                                                                                                    | 224,768 |
| #21 | Search: lower limb*[Text Word] Sort by: Most Recent                                                                                                                                                                                                                                                                                                                                                                                                                                    | 60,001  |
| #20 | Search: lower extremit*[Text Word] Sort by: Most Recent                                                                                                                                                                                                                                                                                                                                                                                                                                | 78,177  |
| #19 | Search: "Leg Bones"[Mesh:NoExp] Sort by: Most Recent                                                                                                                                                                                                                                                                                                                                                                                                                                   | 584     |
| #18 | Search: "Bones of Lower Extremity"[Mesh:NoExp] Sort by: Most Recent                                                                                                                                                                                                                                                                                                                                                                                                                    | 609     |
| #17 | Search: "Tibia"[Mesh] Sort by: Most Recent                                                                                                                                                                                                                                                                                                                                                                                                                                             | 38,407  |
| #16 | Search: "Fibula"[Mesh] Sort by: Most Recent                                                                                                                                                                                                                                                                                                                                                                                                                                            | 9,507   |
| #15 | Search: "Femur"[Mesh] Sort by: Most Recent                                                                                                                                                                                                                                                                                                                                                                                                                                             | 60,313  |
| #14 | Search: "Thigh"[Mesh] Sort by: Most Recent                                                                                                                                                                                                                                                                                                                                                                                                                                             | 13,541  |
| #13 | Search: "Leg"[Mesh] Sort by: Most Recent                                                                                                                                                                                                                                                                                                                                                                                                                                               | 65,693  |
| #12 | Search: "Lower Extremity"[Mesh:NoExp] Sort by: Most Recent                                                                                                                                                                                                                                                                                                                                                                                                                             | 24,160  |
| #11 | Search: "Bone Lengthening"[Mesh:NoExp] OR bone lengthening[Text Word] OR limb lengthening[Text Word] OR leg lengthening[Text Word] OR femur lengthening[Text Word] OR femoral lengthening[Text Word] OR tibial lengthening[Text Word] OR limb extensi*[Text Word] OR limb equali*[Text Word] Sort by: Most Recent                                                                                                                                                                      | 3,875   |
| #10 | Search: limb equali*[Text Word] Sort by: Most Recent                                                                                                                                                                                                                                                                                                                                                                                                                                   | 17      |
| #9  | Search: limb extensi*[Text Word] Sort by: Most Recent                                                                                                                                                                                                                                                                                                                                                                                                                                  | 267     |
| #8  | Search: tibial lengthening[Text Word] Sort by: Most Recent                                                                                                                                                                                                                                                                                                                                                                                                                             | 314     |
| #7  | Search: femoral lengthening[Text Word] Sort by: Most Recent                                                                                                                                                                                                                                                                                                                                                                                                                            | 266     |
| #6  | Search: femur lengthening[Text Word] Sort by: Most Recent                                                                                                                                                                                                                                                                                                                                                                                                                              | 34      |
| #5  | Search: leg lengthening[Text Word] Sort by: Most Recent                                                                                                                                                                                                                                                                                                                                                                                                                                | 450     |
| #4  | Search: limb lengthening[Text Word] Sort by: Most Recent                                                                                                                                                                                                                                                                                                                                                                                                                               | 1,091   |
| #3  | Search: bone lengthening[Text Word] Sort by: Most Recent                                                                                                                                                                                                                                                                                                                                                                                                                               | 2,635   |
| #2  | Search: "Bone Lengthening"[Mesh:NoExp] Sort by: Most Recent                                                                                                                                                                                                                                                                                                                                                                                                                            | 2,318   |

## Embase

| No. | Query                                                                                 | Results  |
|-----|---------------------------------------------------------------------------------------|----------|
| #15 | #13 NOT #14                                                                           | 2,982    |
| #14 | #13 AND ('conference abstract'/it OR 'conference paper'/it OR 'conference review'/it) | 315      |
| #13 | #4 AND #12                                                                            | 3297     |
| #12 | #5 OR #6 OR #7 OR #8 OR #9 OR #10 OR #11                                              | 105,1074 |
| #11 | calf:ti,ab,kw OR calves:ti,ab,kw OR shin*:ti,ab,kw OR thigh*:ti,ab,kw                 | 141,703  |
| #10 | tibia*:ti,ab,kw OR fibula*:ti,ab,kw                                                   | 134,814  |
| #9  | leg:ti,ab,kw OR legs:ti,ab,kw                                                         | 180,167  |
| #8  | femur:ti,ab,kw OR femoral:ti,ab,kw                                                    | 249,708  |
| #7  | (lower NEAR/1 (limb* OR extremit*)):ti,ab,kw                                          | 174,780  |

|    |                                                                                   |         |
|----|-----------------------------------------------------------------------------------|---------|
| #6 | 'leg bone'/de OR 'femur'/exp OR 'fibula'/exp OR 'tibia'/exp                       | 152,184 |
| #5 | 'lower limb'/exp                                                                  | 489,109 |
| #4 | #1 OR #2 OR #3                                                                    | 5,004   |
| #3 | (limb NEAR/1 (equali* OR extensi*)):ti,ab,kw                                      | 628     |
| #2 | ((bone OR limb OR leg OR femur OR femoral OR tibial) NEAR/1 lengthening):ti,ab,kw | 2,585   |
| #1 | 'leg lengthening'/de                                                              | 3,356   |

## Cochrane

| ID  | Search                                                                            | Hits   |
|-----|-----------------------------------------------------------------------------------|--------|
| #1  | MeSH descriptor: [Bone Lengthening] explode all trees                             | 102    |
| #2  | ((bone OR limb OR leg OR femur OR femoral OR tibial) NEAR/1 lengthening):ti,ab,kw | 60     |
| #3  | (limb NEAR/1 (extensi* OR equali*)):ti,ab,kw                                      | 19     |
| #4  | {OR #1-#3}                                                                        | 159    |
| #5  | MeSH descriptor: [Lower Extremity] this term only                                 | 1,502  |
| #6  | MeSH descriptor: [Leg] explode all trees                                          | 3,007  |
| #7  | MeSH descriptor: [Thigh] explode all trees                                        | 529    |
| #8  | MeSH descriptor: [Femur] explode all trees                                        | 1,373  |
| #9  | MeSH descriptor: [Fibula] explode all trees                                       | 81     |
| #10 | MeSH descriptor: [Tibia] explode all trees                                        | 663    |
| #11 | MeSH descriptor: [Bones of Lower Extremity] this term only                        | 7      |
| #12 | MeSH descriptor: [Leg Bones] this term only                                       | 15     |
| #13 | (lower NEXT limb*):ti,ab,kw                                                       | 12,110 |
| #14 | (lower NEXT extremi*):ti,ab,kw                                                    | 9,160  |
| #15 | (femur OR femoral OR leg OR legs OR tibia* OR fibula*):ti,ab,kw                   | 47,306 |
| #16 | (calf OR calves OR shin* OR thigh*):ti,ab,kw                                      | 8,672  |
| #17 | {OR #5-#16}                                                                       | 64,989 |
| #18 | #4 AND #17                                                                        | 86     |

## Web of Science

| #  | Searches                                                                                          | Hits    |
|----|---------------------------------------------------------------------------------------------------|---------|
| #1 | (Bone OR limb OR leg OR femur OR femoral OR tibial) NEAR/1 lengthening (Topic)                    | 2,120   |
| #2 | TS=(limb NEAR/1 (extension* OR equaliz*))                                                         | 510     |
| #3 | #1 OR #2                                                                                          | 2,610   |
| #4 | lower NEAR/1 (extremi* OR limb*) (Topic)                                                          | 115,981 |
| #5 | leg OR legs OR femur OR femoral OR tibia* OR fibula* OR calf OR calves OR shin* OR thigh* (Topic) | 569,663 |
| #6 | #4 OR #5                                                                                          | 652,318 |
| #7 | #3 AND #6                                                                                         | 1,739   |
| #8 | #3 AND #6 and Meeting Abstract or Proceeding Paper (Exclude – Document Types)                     | 1,615   |

## Scopus

| # | Searches | Hits |
|---|----------|------|
|---|----------|------|

|    |                                                                                                                                                                                                                                                                                                                                                                                                                                                                                                                 |         |
|----|-----------------------------------------------------------------------------------------------------------------------------------------------------------------------------------------------------------------------------------------------------------------------------------------------------------------------------------------------------------------------------------------------------------------------------------------------------------------------------------------------------------------|---------|
| #8 | (( TITLE-ABS-KEY ( "bone lengthening" OR "limb lengthening" OR "leg lengthening" OR "femur lengthening" OR "femoral lengthening" OR "tibial lengthening" )) OR ( TITLE-ABS-KEY ( "limb extension*" OR "limb equaliz*" ) )) AND ( ( TITLE-ABS-KEY ( "lower extremit*" OR "lower limb*" ) ) OR ( TITLE-ABS-KEY ( leg OR legs OR femur OR femoral OR tibia* OR fibula* OR calf OR calves OR shin* OR thigh* ) ) ) AND ( EXCLUDE ( DOCTYPE , "cp" ) OR EXCLUDE ( DOCTYPE , "ch" ) OR EXCLUDE ( DOCTYPE , "bk" ) ) ) | 4,355   |
| #7 | (( TITLE-ABS-KEY ( "bone lengthening" OR "limb lengthening" OR "leg lengthening" OR "femur lengthening" OR "femoral lengthening" OR "tibial lengthening" )) OR ( TITLE-ABS-KEY ( "limb extension*" OR "limb equaliz*" ) )) AND ( ( TITLE-ABS-KEY ( "lower extremit*" OR "lower limb*" ) ) OR ( TITLE-ABS-KEY ( leg OR legs OR femur OR femoral OR tibia* OR fibula* OR calf OR calves OR shin* OR thigh* ) ) )                                                                                                  | 4,554   |
| #6 | ( TITLE-ABS-KEY ( "lower extremit*" OR "lower limb*" ) ) OR ( TITLE-ABS-KEY ( leg OR legs OR femur OR femoral OR tibia* OR fibula* OR calf OR calves OR shin* OR thigh* ) )                                                                                                                                                                                                                                                                                                                                     | 975,157 |
| #5 | TITLE-ABS-KEY ( leg OR legs OR femur OR femoral OR tibia* OR fibula* OR calf OR calves OR shin* OR thigh* )                                                                                                                                                                                                                                                                                                                                                                                                     | 892,211 |
| #4 | TITLE-ABS-KEY ( "lower extremit*" OR "lower limb*" )                                                                                                                                                                                                                                                                                                                                                                                                                                                            | 163,077 |
| #3 | ( TITLE-ABS-KEY ( "bone lengthening" OR "limb lengthening" OR "leg lengthening" OR "femur lengthening" OR "femoral lengthening" OR "tibial lengthening" ) ) OR ( TITLE-ABS-KEY ( "limb extension*" OR "limb equaliz*" ) )                                                                                                                                                                                                                                                                                       | 5,413   |
| #2 | TITLE-ABS-KEY ( "limb extension*" OR "limb equaliz*" )                                                                                                                                                                                                                                                                                                                                                                                                                                                          | 419     |
| #1 | TITLE-ABS-KEY ( "bone lengthening" OR "limb lengthening" OR "leg lengthening" OR "femur lengthening" OR "femoral lengthening" OR "tibial lengthening" )                                                                                                                                                                                                                                                                                                                                                         | 5,005   |
