# Supplementary material for: Outcomes and outcome measurement instruments in lower-limb lengthening surgery: a scoping review to inform core outcome set development
Source: PubMed Central journal article supplement (PMC11605704; doi:10.2340/17453674.2024.42488), 2024-11-29
Supplement: ActaO-95-42488-s3.pdf [file ActaO-95-42488-s3.pdf]

# COS

---

Record ID

---

Article

---

Publication year

- 2024
- 2023
- 2022
- 2021
- 2020
- 2019
- 2018
- 2017
- 2016
- 2015
- 2014

---

Intervention type

- PRECICE ®
- PRECICE (P1) ®
- PRECICE (P2) ®
- Extramedullary use of PRECICE ®
- PRECICE plate ® (magnetic expandable plate)
- STRYDE nail ® (STRYDE, or PRECICE STRYDE)
- FITBONE ®
- ISKD ® nail
- Internal lengthening nail
- Magnetic internal lengthening nail
- Mechanical internal lengthening nail
- Monolateral external fixators (Orthofix, MRS-Modular Rail System, limb reconstruction system, monorail external fixator, etc.)
- Circular external fixator - Ilizarov
- Circular external fixator - Classic-type
- Circular external fixator - Hexapod
- Circular external fixator - Computer-controlled hexapod
- Circular external fixator - TSF (Taylor Spatial Frame)
- Lengthening and then nailing (LATN)
- Other

---

Other

---

Intervention site

- Femur
- Tibia

---

Journal name

- Acta Orthopaedica
- Acta Orthopaedica Belgica
- Archives of Orthopaedic and Trauma Surgery
- BMC Musculoskeletal Disorders
- BMC Surgery
- Children (MDPI)
- Clinical Orthopaedics and Related Research
- Indian Journal of Orthopaedics
- Injury
- International Orthopaedics
- JBJS (The Journal of Bone and Joint Surgery)
- JBJS Case Connector
- Journal of Children's Orthopaedics
- Journal of Clinical Medicine (MDPI)
- Journal of Limb Lengthening & Reconstruction (JLLR)
- Journal of Orthopaedic Science
- Journal of Orthopaedic Surgery
- Journal of Orthopaedics
- Journal of Orthopaedics Trauma
- Journal of Pediatric Orthopaedics
- Journal of Pediatric Orthopaedics B
- Ortopedia Traumatologia Rehabilitacja
- Orthopaedic Surgery
- Orthopaedics & Traumatology: Surgery & Research
- Orthopedics
- Strategies in Trauma and Limb Reconstruction
- Techniques in Orthopaedics
- THE BONE & JOINT JOURNAL
- Other

---

Other

---

## Location

- Afghanistan
- Albania
- Algeria
- Andorra
- Angola
- Antigua and Barbuda
- Argentina
- Armenia
- Aruba
- Australia
- Austria
- Azerbaijan
- Bahrain
- Bangladesh
- Barbados
- Belarus
- Belgium
- Belize
- Benin
- Bhutan
- Bolivia
- Bosnia and Herzegovina
- Botswana
- Brazil
- Brunei
- Bulgaria
- Burkina Faso
- Burma
- Burundi
- Cambodia
- Cameroon
- Canada
- Cape Verde
- Central African Republic
- Chad
- Chile
- China
- Colombia
- Comoros
- Republic of the
- Costa Rica
- Cote d'Ivoire
- Croatia
- Cuba
- Curacao
- Cyprus
- Czech Republic
- Denmark
- Djibouti
- Dominica
- Dominican Republic
- East Timor (see Timor-Leste)
- Ecuador
- Egypt
- El Salvador
- Equatorial Guinea
- Eritrea
- Estonia
- Ethiopia
- Fiji
- Finland
- France
- Gabon
- Georgia
- Germany
- Ghana
- Greece
- Grenada
- Guatemala

- Guinea
- Guinea-Bissau
- Guyana
- Haiti
- Holy See
- Honduras
- Hong Kong
- Hungary
- Iceland
- India
- Indonesia
- Iran
- Iraq
- Ireland
- Israel
- Italy
- Jamaica
- Japan
- Jordan
- Kazakhstan
- Kenya
- Kiribati
- Kosovo
- Kuwait
- Kyrgyzstan
- Laos
- Latvia
- Lebanon
- Lesotho
- Liberia
- Libya
- Liechtenstein
- Lithuania
- Luxembourg
- Macau
- Macedonia
- Madagascar
- Malawi
- Malaysia
- Maldives
- Mali
- Malta
- Marshall Islands
- Mauritania
- Mauritius
- Mexico
- Micronesia
- Moldova
- Monaco
- Mongolia
- Montenegro
- Morocco
- Mozambique
- Namibia
- Nauru
- Nepal
- Netherlands
- Netherlands Antilles
- New Zealand
- Nicaragua
- Niger
- Nigeria
- North Korea
- Norway
- Oman
- Pakistan
- Palau
- Palestinian Territories
- Panama
- Papua New Guinea
- Paraguay

- Peru
- Philippines
- Poland
- Portugal
- Qatar
- Romania
- Russia
- Rwanda
- Saint Kitts and Nevis
- Saint Lucia
- Saint Vincent and the Grenadines
- Samoa
- San Marino
- Sao Tome and Principe
- Saudi Arabia
- Senegal
- Serbia
- Seychelles
- Sierra Leone
- Singapore
- Sint Maarten
- Slovakia
- Slovenia
- Solomon Islands
- Somalia
- South Africa
- South Korea
- South Sudan
- Spain
- Sri Lanka
- Sudan
- Suriname
- Swaziland
- Sweden
- Switzerland
- Syria
- Taiwan
- Tajikistan
- Tanzania
- Thailand
- Timor-Leste
- Togo
- Tonga
- Trinidad and Tobago
- Tunisia
- Turkey
- Turkmenistan
- Tuvalu
- Uganda
- Ukraine
- United Arab Emirates
- United Kingdom
- United States of America
- Uruguay
- Uzbekistan
- Vanuatu
- Venezuela
- Vietnam
- Yemen
- Zambia
- Zimbabwe
- Other
- South Korea

---

Other \_\_\_\_\_

---

Study centers  Single-center  
 Multicenter

---

Study design  Case report  
 Case series  
Only choose two types when you are confused  (Database) review (of prospectively collected data)  
 Case-control  
 Cross-sectional  
 Cohort  
 RCT

---

Study details  Retrospective  
 Prospective  
 Other

---

Other \_\_\_\_\_

---

Mean age (years) \_\_\_\_\_

---

Age range \_\_\_\_\_

---

Pediatric, adult, mix?  Pediatric  
 Adult  
 Mix

The paediatric population is defined as 16 years and younger ( $\leq 16$ ) at the time of surgery. For both males and females, 16 years is the cut-off age to divide the population into adult and paediatric. Those studies that include both patients  $\leq 16$  and  $> 16$  years of age are referred to as MIX studies.

---

Total number of patients \_\_\_\_\_

---

Number of females \_\_\_\_\_

---

Number of males \_\_\_\_\_

---

Follow-up duration (months) \_\_\_\_\_

---

Are study inclusion-exclusion criteria clearly stated?  Yes  
 No

---

Is the primary outcome clearly stated?  Yes  
 No

---

Are secondary outcomes clearly stated?  Yes  
 No
