# Supplementary material for: Outcomes and outcome measurement instruments in lower-limb lengthening surgery: a scoping review to inform core outcome set development
Source: Acta Orthop. 2024 Nov 29;95:715–22. doi: 10.2340/17453674.2024.42488 (PMC11605704; doi:10.2340/17453674.2024.42488)
Supplement: Supplementary file 2 [file ActaO-95-42488-s2.pdf]

## Appendix 2.1. Data extraction form on Excel

| Title                    | Publication Year | Verbatim Outcomes  | Primary/<br>Secondary outcome                         | CORE AREAS | OUTCOME DOMAINS | OUTCOME HEADINGS | Subheadings    |
|--------------------------|------------------|--------------------|-------------------------------------------------------|------------|-----------------|------------------|----------------|
|                          |                  |                    |                                                       |            |                 |                  |                |
| Title                    | Year             | Outcome/ Domain    | Definitions - Outcome Measurement Instruments (OMIs)  |            |                 | Outcome Heading  | Outcome Domain |
|                          |                  |                    |                                                       |            |                 |                  |                |
| OMI - Composite Outcomes |                  | Facets within OMIs | Definition of OMI (from the article or the reference) |            |                 |                  |                |
|                          |                  |                    |                                                       |            |                 |                  |                |
